# Supplementary material for: Genetic Risk Reclassification for Type 2 Diabetes by Age Below or Above 50 Years Using 40 Type 2 Diabetes Risk Single Nucleotide Polymorphisms
Source: Oxford University Press journal article supplement (doi:10.2337/dc10-1265), 2010-10-02
Supplement: dc101265onlineappendix.pdf [file dc101265onlineappendix.pdf]

**Supplementary Table A1:** Framingham Offspring characteristics at baseline for each of four time periods in the pooled analysis.

|                                              | Period 1    |      | Period 2    |      | Period 3    |      | Period 4    |      | Total       |
|----------------------------------------------|-------------|------|-------------|------|-------------|------|-------------|------|-------------|
| Offspring examination                        | Exam 1-2    |      | Exam 2-4    |      | Exam 4-6    |      | Exam 6-8    |      | Exam 1-8    |
| Calendar year                                | 1971 - 1983 |      | 1979 - 1991 |      | 1987 - 1998 |      | 1995 - 2007 |      | 1971 - 2007 |
| Period interval length, years (SD)*          | 7.9         | 0.6  | 7.8         | 0.6  | 7.7         | 0.7  | 9.5         | 1.0  | 8.2   1.0   |
| Number of subjects                           | 3,213       |      | 2,740       |      | 2,783       |      | 2,622       |      | 11,358      |
| Age, mean years (SD)                         | 36          | 9.4  | 43          | 9.8  | 51          | 9.8  | 58          | 9.6  | 46   12.7   |
| Female (%)                                   | 53.3        |      | 53.0        |      | 52.8        |      | 54.8        |      | 53.5        |
| Self-reported family history of diabetes (%) | 17.3        |      | 17.8        |      | 18.0        |      | 17.8        |      | 17.7        |
| BMI, mean kg/m <sup>2</sup> (SD) †           | 25.0        | 4.1  | 25.3        | 4.2  | 26.5        | 4.6  | 27.5        | 4.8  | 26.0   4.5  |
| Systolic blood pressure, mean mm Hg (SD)     | 121         | 15.4 | 122         | 17.9 | 128         | 21.6 | 132         | 22.9 | 126   20.1  |
| HDL-C, mean mg/dL (SD) ‡                     | 51.9        | 14.7 | 49.1        | 13.4 | 50.5        | 14.7 | 52.2        | 16.1 | 50.8   14.8 |
| Triglyceride, mean mg/dL (SD)                | 89          | 68.2 | 99          | 80.3 | 118         | 88.2 | 133         | 82.1 | 109   81.4  |
| Fasting plasma glucose, mean mg/dL (SD)      | 91          | 8.0  | 91          | 8.9  | 91          | 9.0  | 97          | 9.8  | 92   9.2    |
| Number of diabetes cases at end of interval  | 54          |      | 66          |      | 163         |      | 163         |      | 446         |

\*SD: standard deviation. †BMI: body mass index, weight in kg/square of height in m. ‡HDL: high density lipoproteins.

**Supplementary Table A2: Genetic loci in descending order position, genotype frequencies and individual associations with diabetes in Framingham for the 40 autosomal SNPs associated with type 2 diabetes in prior studies (4-10).**

| SNP*       | Locus†               | Chr‡ | Risk allele | Risk allele frequency in Framingham§ | Odds Ratio per risk allele for diabetes in Framingham | 95% Confidence Interval |        | P Value |
|------------|----------------------|------|-------------|--------------------------------------|-------------------------------------------------------|-------------------------|--------|---------|
| rs10923931 | <i>NOTCH2</i>        | 1    | T           | 9.6%                                 | 1.05                                                  | 0.86                    | - 1.35 | 0.51    |
| rs340874   | <i>PROX1</i>         | 1    | C           | 52.1%                                | 1.16                                                  | 0.98                    | - 1.36 | 0.08    |
| rs780094   | <i>GCKR</i>          | 2    | C           | 55.1%                                | 1.13                                                  | 0.98                    | - 1.29 | 0.09    |
| rs7578597  | <i>THADA</i>         | 2    | T           | 89.9%                                | 1.30                                                  | 1.01                    | - 1.68 | 0.04    |
| rs243021   | <i>BCL11A</i>        | 2    | A           | 44.9%                                | 1.11                                                  | 0.96                    | - 1.27 | 0.15    |
| rs7593730  | <i>RBMS1/ITGB6</i>   | 2    | C           | 23.6%                                | 0.92                                                  | 0.78                    | - 1.08 | 0.29    |
| rs7578326  | <i>KIAA1486</i>      | 2    | A           | 65.7%                                | 0.99                                                  | 0.85                    | - 1.15 | 0.87    |
| rs1801282  | <i>PPARg</i>         | 3    | C           | 88.8%                                | 1.09                                                  | 0.87                    | - 1.36 | 0.46    |
| rs4607103  | <i>ADAMTS9</i>       | 3    | C           | 73.4%                                | 1.06                                                  | 0.91                    | - 1.24 | 0.46    |
| rs11708067 | <i>ADCY5</i>         | 3    | A           | 79.1%                                | 1.13                                                  | 0.95                    | - 1.36 | 0.17    |
| rs1470579  | <i>IGF2BP2</i>       | 3    | C           | 33.3%                                | 1.06                                                  | 0.93                    | - 1.23 | 0.35    |
| rs10010131 | <i>WFS1</i>          | 4    | G           | 60.3%                                | 1.02                                                  | 0.89                    | - 1.18 | 0.75    |
| rs4457053  | <i>ZBED3</i>         | 5    | G           | 32.9%                                | 0.99                                                  | 0.85                    | - 1.16 | 0.92    |
| rs7754840  | <i>CDKAL1</i>        | 6    | C           | 31.4%                                | 1.13                                                  | 0.98                    | - 1.31 | 0.10    |
| rs9472138  | <i>VEGFA</i>         | 6    | T           | 28.5%                                | 1.13                                                  | 0.98                    | - 1.31 | 0.10    |
| rs2191349  | <i>DGKB/TME195</i>   | 7    | T           | 55.4%                                | 1.14                                                  | 0.99                    | - 1.30 | 0.07    |
| rs864745   | <i>JAZF1</i>         | 7    | T           | 49.2%                                | 1.05                                                  | 0.93                    | - 1.21 | 0.41    |
| rs4607517  | <i>GCK</i>           | 7    | A           | 18.1%                                | 1.15                                                  | 0.97                    | - 1.37 | 0.11    |
| rs972283   | <i>KLF14</i>         | 7    | G           | 52.4%                                | 1.08                                                  | 0.94                    | - 1.24 | 0.26    |
| rs896854   | <i>TP53INP1</i>      | 8    | T           | 47.8%                                | 0.99                                                  | 0.86                    | - 1.14 | 0.88    |
| rs13266634 | <i>SLC30A8</i>       | 8    | C           | 74.1%                                | 1.01                                                  | 0.77                    | - 1.33 | 0.92    |
| rs10811661 | <i>CDKNA2B</i>       | 9    | T           | 81.7%                                | 1.49                                                  | 1.21                    | - 1.80 | 0.0001  |
| rs13292136 | <i>TLE4</i>          | 9    | C           | 94.3%                                | 1.15                                                  | 0.83                    | - 1.59 | 0.41    |
| rs12779790 | <i>CDC123,CAMK1D</i> | 10   | G           | 17.9%                                | 1.01                                                  | 0.83                    | - 1.24 | 0.89    |
| rs1111875  | <i>HHEX</i>          | 10   | C           | 59.8%                                | 1.06                                                  | 0.92                    | - 1.21 | 0.45    |
| rs7903146  | <i>TCF7L2</i>        | 10   | T           | 31.7%                                | 1.30                                                  | 1.13                    | - 1.49 | 0.0003  |
| rs2334499  | <i>HCCA2</i>         | 11   | T           | 38.7%                                | 1.13                                                  | 0.97                    | - 1.33 | 0.13    |
| rs231362   | <i>KCNQ1</i>         | 11   | G           | 50.6%                                | 1.01                                                  | 0.85                    | - 1.19 | 0.95    |
| rs2237892  | <i>KCNQ1</i>         | 11   | C           | 7.8%                                 | 0.97                                                  | 0.69                    | - 1.36 | 0.86    |
| rs5215     | <i>KCNJ11</i>        | 11   | C           | 35.8%                                | 1.05                                                  | 0.91                    | - 1.20 | 0.56    |
| rs1552224  | <i>CENTD2</i>        | 11   | A           | 86.3%                                | 1.05                                                  | 0.86                    | - 1.29 | 0.63    |
| rs10830963 | <i>MTNR1B</i>        | 11   | G           | 28.1%                                | 1.21                                                  | 1.01                    | - 1.44 | 0.04    |
| rs1153188  | <i>DCD</i>           | 12   | A           | 74.0%                                | 0.94                                                  | 0.80                    | - 1.09 | 0.39    |
| rs1531343  | <i>HMGA2</i>         | 12   | C           | 11.7%                                | 1.08                                                  | 0.89                    | - 1.32 | 0.45    |
| rs7961581  | <i>TSPAN8,LGR5</i>   | 12   | C           | 30.2%                                | 1.12                                                  | 0.96                    | - 1.29 | 0.17    |
| rs7957197  | <i>OASL/TCF1</i>     | 12   | T           | 80.3%                                | 1.06                                                  | 0.89                    | - 1.26 | 0.52    |
| rs11634397 | <i>ZFAND6</i>        | 15   | G           | 65.5%                                | 1.09                                                  | 0.93                    | - 1.27 | 0.28    |
| rs8042680  | <i>PRC1</i>          | 15   | A           | 32.9%                                | 0.98                                                  | 0.85                    | - 1.13 | 0.79    |
| rs9939609  | <i>FTO</i>           | 16   | A           | 39.7%                                | 1.10                                                  | 0.95                    | - 1.26 | 0.21    |
| rs757210   | <i>HNF1B</i>         | 17   | T           | 39.4%                                | 0.88                                                  | 0.64                    | - 1.19 | 0.40    |

\*SNPs: single nucleotide polymorphisms. †rs689 in *INS*, on chromosome 11, previously included in our 18-SNP genetic risk score (1), was not replicated in posterior meta-analyses and is therefore not included in the current analysis. rs5945326, in *DUSP9*, on chromosome X (10), is not included in the analysis, since it was not genotyped or imputed in the Framingham Offspring Study. ‡Chr: chromosome.

§ Risk allele frequency in Framingham: subjects without diabetes

*P* values and odds ratios for type 2 diabetes associated with individual risk SNPs are estimated from additive pooled logistic regression models with generalized estimating equations adjusted for age, age<sup>2</sup>, and sex.

We had 80% statistical power to detect ORs for risk of type 2 diabetes of 1.28 for MAF = 20%, ORs of 1.25 for MAF = 30% and ORs of 1.23 for MAF = 50%, for an uncorrected for multiple testing two-sided  $\alpha$  of 0.05.

**Supplementary Table A3:** Odds ratios (ORs) and risk for incident type 2 diabetes associated with 40 individual SNPs\*, a weighted 40-SNP genetic risk score and a weighted 17-SNP genetic risk score in the Framingham Offspring Study, stratified by age (<50 years and ≥50 years old), in the sex-adjusted model.

|                                                  | Model without genetic information |               | Model using 40 individual SNPs |                      | Model using 40-SNP weighted risk score |               | Model using prior 17-SNP weighted risk score |               |
|--------------------------------------------------|-----------------------------------|---------------|--------------------------------|----------------------|----------------------------------------|---------------|----------------------------------------------|---------------|
| Subjects < 50 years old (N = 144 diabetes cases) |                                   |               |                                |                      |                                        |               |                                              |               |
| Model: Sex-adjusted                              |                                   |               |                                |                      |                                        |               |                                              |               |
|                                                  | OR                                | (95% CI)      | OR                             | (95% CI)             | OR                                     | (95% CI)      | OR                                           | (95% CI)      |
| Men (vs. women)                                  | 1.46                              | (1.05-2.03)   | 1.48                           | (1.05-2.07)          | 1.43                                   | (1.03-2.00)   | 1.44                                         | (1.03-2.00)   |
| Genetic risk score                               | -                                 | -             | -                              | -                    | 1.29                                   | (1.19-1.40)   | 1.40                                         | (1.24-1.57)   |
| C-statistic (95% CI)†                            | 0.547                             | (0.505-0.588) | 0.712                          | (0.670-0.753)        | 0.657                                  | (0.611-0.703) | 0.645                                        | (0.600-0.690) |
| P value for difference in C-statistic            |                                   |               | 3.5x10 <sup>-11</sup>          |                      | 8.8x10 <sup>-6</sup>                   |               | 0.00006                                      |               |
| Calibration Chi Square (P value)                 |                                   |               |                                | 6.38 (0.6)           |                                        | 9.41 (0.3)    |                                              | 9.64 (0.29)   |
| Net reclassification improvement                 |                                   |               |                                | 24.8%                |                                        | 13.8%         |                                              | 11.0%         |
| P value                                          |                                   |               |                                | 5.1x10 <sup>-6</sup> |                                        | 0.005         |                                              | 0.03          |
|                                                  |                                   |               |                                |                      |                                        |               |                                              |               |
|                                                  | Model without genetic information |               | Model using 40 individual SNPs |                      | Model using 40-SNP weighted risk score |               | Model using prior 17-SNP weighted risk score |               |
| Subjects ≥ 50 years old (N = 302 diabetes cases) |                                   |               |                                |                      |                                        |               |                                              |               |
| Model: Sex-adjusted                              |                                   |               |                                |                      |                                        |               |                                              |               |
|                                                  | OR                                | (95% CI)      | OR                             | (95% CI)             | OR                                     | (95% CI)      | OR                                           | (95% CI)      |
| Men (vs. women)                                  | 1.57                              | (1.24-1.99)   | 1.59                           | (1.25-2.03)          | 1.59                                   | (1.25-2.01)   | 1.59                                         | (1.26-2.01)   |
| Genetic risk score                               | -                                 | -             | -                              | -                    | 1.12                                   | (1.05-1.19)   | 1.14                                         | (1.05-1.24)   |
| C-statistic (95% CI)                             | 0.557                             | (0.528-0.586) | 0.630                          | (0.597-0.663)        | 0.590                                  | (0.557-0.623) | 0.581                                        | (0.548-0.614) |
| P value for difference in C-statistic            |                                   |               | 3.2x10 <sup>-6</sup>           |                      | 0.003                                  |               | 0.01                                         |               |
| Calibration Chi Square (P value)                 |                                   |               |                                | 4.27 (0.8)           |                                        | 3.32 (0.9)    |                                              | 2.37 (0.97)   |
| Net reclassification improvement                 |                                   |               |                                | 8.5%                 |                                        | 0.5%          |                                              | -3.1%         |
| P value                                          |                                   |               |                                | 0.01                 |                                        | 0.9           |                                              | 0.3           |

\*SNP: single-nucleotide polymorphism. †95% CI: 95% confidence interval. No age-adjustment was done in the age-stratified models.

To evaluate the individual contribution of each SNP, we entered one term per SNP (total 40 terms plus terms for sex or clinical variables) in the logistic regression models.

We constructed a weighted genetic risk score using 40 SNPs currently associated with type 2 diabetes, and a weighted genetic risk score using 17 SNPs that we used in our previous report (1). rs689, at *INS*, on chromosome 11, previously included in our 18-SNP genetic risk score (1), was not replicated in posterior meta-analyses and is therefore not included in the current 17-SNP or 40-SNP analyses. Moreover, rs5945326, at *DUSP9*, on chromosome X (10), is not included in the analysis, since there are no available genotyping or imputation data for this SNP in the Framingham Offspring Study.

For the construction of the weighted risk scores, we counted risk alleles (0,1,2) for each genotyped SNP -or its dosage, when imputed- (actual distribution ranging from 28 to 53) and multiplied each SNP genotype by its published beta coefficient for diabetes risk (10). We added up the product of that multiplication at each SNP, divided the sum by twice the sum of the betas and multiplied the result by the number of SNPs.

Odds ratios (ORs), 95% CI and C-statistics for the 144 cases of diabetes in 6,763 person-observations in subjects <50 years old and for the 302 cases of diabetes in 4,595 person-observations in subjects ≥50 years old were calculated using pooled logistic regression with generalized estimating equations. Mean age at diabetes onset was 49.30 years for subjects younger than 50 years at baseline and 66.07 years for subjects older than 50 years.

For NRI evaluation, we established three risk categories (low, intermediate and high). The percentages of low, medium and high risk of diabetes are based on the distribution of the cumulative incidence of diabetes across our population, in which cumulative incidence was low for a predicted risk <2%, intermediate for predicted risks ≥2% and ≤ 8%, and high when predicted risk was >8% (this assumption is an *a priori* requirement for the NRI calculation) (15). NRI is better if more people who develop diabetes are reclassified as higher-risk when the genotype score is added to the model, and more people who remain free of diabetes are classified as lower-risk when the score is added. The NRI is penalized for mis-reclassification; for instance, if many people who develop diabetes are classified as lower risk by adding the genetic risk score to the model.

**Supplementary Table A4:** Odds ratios (ORs) and risk for incident type 2 diabetes associated with 40 individual SNPs\*, a weighted 40-SNP genetic risk score and a weighted 17-SNP genetic risk score in the Framingham Offspring Study, both in sex- and simple clinical variables- adjusted models, for the population overall.

|                                              | Model without genetic information |               | Model using 40 individual SNPs |                       | Model using 40-SNP weighted risk score |               | Model using prior 17-SNP weighted risk score |               |
|----------------------------------------------|-----------------------------------|---------------|--------------------------------|-----------------------|----------------------------------------|---------------|----------------------------------------------|---------------|
| Population overall (N = 446 diabetes cases)  |                                   |               |                                |                       |                                        |               |                                              |               |
| Model: Sex-adjusted                          |                                   |               |                                |                       |                                        |               |                                              |               |
|                                              | OR                                | (95% CI)      | OR                             | (95% CI)              | OR                                     | (95% CI)      | OR                                           | (95% CI)      |
| Men (vs. women)                              | 1.53                              | (1.26-1.85)   | 1.53                           | (1.26-1.86)           | 1.53                                   | (1.26-1.85)   | 1.53                                         | (1.26-1.85)   |
| Genetic risk score                           | -                                 | -             | -                              | -                     | 1.17                                   | (1.11-1.22)   | 1.22                                         | (1.14-1.30)   |
| <b>C-statistic (95% CI)†</b>                 | 0.553                             | (0.530-0.577) | 0.631                          | (0.605-0.657)         | 0.606                                  | (0.579-0.632) | 0.596                                        | (0.570-0.623) |
| <i>P</i> value for difference in C-statistic |                                   |               | 3.1x10 <sup>-9</sup>           |                       | 4.9x10 <sup>-6</sup>                   |               | 0.00005                                      |               |
| Calibration Chi Square ( <i>P</i> value)     |                                   |               |                                | 13.69 (0.09)          |                                        | 3.38 (0.91)   |                                              | 6.94 (0.54)   |
| <b>Net reclassification improvement</b>      |                                   |               |                                | 13.9%                 |                                        | 4.1%          |                                              | 3.1%          |
| <i>P</i> value                               |                                   |               |                                | 2.9x10 <sup>-14</sup> |                                        | 0.0009        |                                              | 0.002         |
| Model: Simple clinical variables -adjusted‡  |                                   |               |                                |                       |                                        |               |                                              |               |
|                                              | OR                                | (95% CI)      | OR                             | (95% CI)              | OR                                     | (95% CI)      | OR                                           | (95% CI)      |
| Age (per year)                               | 1.01                              | (1.00-1.02)   | 1.01                           | (1.00-1.02)           | 1.01                                   | (1.00-1.02)   | 1.01                                         | (1.00-1.02)   |
| Men (vs. women)                              | 0.78                              | (0.61-0.99)   | 0.79                           | (0.62-1.01)           | 0.79                                   | (0.62-1.01)   | 0.80                                         | (0.63-1.02)   |
| Family history of diabetes vs. not           | 2.19                              | (1.72-2.77)   | 2.23                           | (1.75-2.85)           | 2.19                                   | (1.72-2.78)   | 2.19                                         | (1.73-2.78)   |
| Body mass index, per kg/m <sup>2</sup>       | 1.10                              | (1.07-1.12)   | 1.11                           | (1.08-1.15)           | 1.10                                   | (1.08-1.13)   | 1.10                                         | (1.08-1.13)   |
| Fasting plasma glucose per mg/dl             | 1.14                              | (1.13-1.15)   | 1.14                           | (1.12-1.13)           | 1.14                                   | (1.12-1.15)   | 1.14                                         | (1.12-1.15)   |
| Systolic blood pressure per mmHg             | 1.01                              | (1.01-1.02)   | 1.01                           | (1.01-1.02)           | 1.01                                   | (1.01-1.02)   | 1.01                                         | (1.01-1.02)   |
| HDL cholesterol, per mg/dL                   | 0.98                              | (0.97-0.99)   | 0.98                           | (0.97-0.99)           | 0.98                                   | (0.97-0.99)   | 0.98                                         | (0.97-0.99)   |
| Fasting triglycerides, per mg/dL             | 1.00                              | (1.00-1.00)   | 1.00                           | (1.00-1.00)           | 1.00                                   | (1.00-1.00)   | 1.00                                         | (1.00-1.00)   |
| Genetic risk score                           | -                                 | -             | -                              | -                     | 1.15                                   | (1.09-1.22)   | 1.22                                         | (1.12-1.32)   |
| <b>C-statistic (95% CI)</b>                  | <b>0.903</b>                      | (0.889-0.917) | <b>0.907</b>                   | (0.893-0.921)         | <b>0.906</b>                           | (0.892-0.920) | <b>0.905</b>                                 | (0.891-0.919) |
| <i>P</i> value for difference in C-statistic |                                   |               | 0.01                           |                       | 0.04                                   |               | 0.11                                         |               |
| Calibration Chi Square ( <i>P</i> value)     |                                   |               |                                | 7.59 (0.47)           |                                        | 8.26 (0.41)   |                                              | 11.89 (0.16)  |
| <b>Net reclassification improvement</b>      |                                   |               |                                | <b>4.3%</b>           |                                        | <b>1.8%</b>   |                                              | <b>1.2%</b>   |
| <i>P</i> value                               |                                   |               |                                | 0.004                 |                                        | 0.2           |                                              | 0.15          |

\* SNP: single-nucleotide polymorphism. †95% CI: 95% confidence interval. ‡"Simple clinical variables- adjusted" model included: sex, family history of diabetes (self-report that one or both parents had diabetes), body mass index, fasting glucose level, systolic blood pressure, HDL (high density lipoprotein) and fasting triglycerides levels (3). No age-adjustment was done in the age-stratified models.

To evaluate the individual contribution of each SNP, we entered one term per SNP (total 40 terms plus terms for sex or clinical variables) in the logistic regression models.

We constructed a weighted genetic risk score using 40 SNPs currently associated with type 2 diabetes, and a weighted genetic risk score using 17 SNPs that we used in our previous report (1). rs689, at *INS*, on chromosome 11, previously included in our 18-SNP genetic risk score (1), was not replicated in posterior meta-analyses and is therefore not included in the current 17-SNP or 40-SNP analyses. Moreover, rs5945326, at *DUSP9*, on chromosome X (10), is not included in the analysis, since there are no available genotyping or imputation data for this SNP in the Framingham Offspring Study.

For the construction of the weighted risk scores, we counted risk alleles (0,1,2) for each genotyped SNP -or its dosage, when imputed- (actual distribution ranging from 28 to 53) and multiplied each SNP genotype by its published beta coefficient for diabetes risk (10). We added up the product of that multiplication at each SNP, divided the sum by twice the sum of the betas and multiplied the result by the number of SNPs.

Odds ratios (ORs), 95% CI and C-statistics for the 446 cases of diabetes in 11,358 person-observations in the population overall were calculated using pooled logistic regression with generalized estimating equations.

For NRI evaluation, we established three risk categories (low, intermediate and high). The percentages of low, medium and high risk of diabetes are based on the distribution of the cumulative incidence of diabetes across our population, in which cumulative incidence was low for a predicted risk <2%, intermediate for predicted risks  $\geq 2\%$  and  $\leq 8\%$ , and high when predicted risk was >8% (this assumption is an *a priori* requirement for the NRI calculation) (15). NRI is better if more people who develop diabetes are reclassified as higher-risk when the genotype score is added to the model, and more people who remain free of diabetes are classified as lower-risk when the score is added. The NRI is penalized for mis-reclassification; for instance, if many people who develop diabetes are classified as lower risk by adding the genetic risk score to the model.



## Supplementary Table A5: List of MAGIC and DIAGRAM+ Consortia investigators.

### MAGIC INVESTIGATORS:

#### MAGIC Investigators and Affiliations

Josée Dupuis 1,2,, Claudia Langenberg 3,, Inga Prokopenko 4,5,, Richa Saxena 6,7,, Nicole Soranzo 8,9,, Anne U Jackson 10, Eleanor Wheeler 11, Nicole L Glazer 12, Nabila Bouatia-Naji 13, Anna L Gloyn 4, Cecilia M Lindgren 4,5, Reedik Mägi 4,5, Andrew P Morris 5, Joshua Randall 5, Toby Johnson 14,15,16, Paul Elliott 17, Denis Rybin 18, Gudmar Thorleifsson 19, Valgerdur Steinthorsdottir 19, Peter Henneman 20, Harald Grallert 21, Abbas Dehghan 22, Jouke Jan Hottenga 23, Christopher S Franklin 24, Pau Navarro 25, Kijoung Song 26, Anuj Goel 5,27, John R B Perry 28, Josephine M Egan 29, Taina Lajunen 30, Niels Grarup 31, Thomas Sparsø 31, Alex Doney 32, Benjamin F Voight 6,7, Heather M Stringham 10, Man Li 33, Stavroula Kanoni 34, Peter Shrader 35, Christine Cavalcanti-Proença 13, Meena Kumari 36, Lu Qi 37, Nicholas J Timpson 38, Christian Gieger 21, Carina Zabena 39, Ghislain Rocheleau 40,41, Erik Ingelsson 42,43, Ping An 44, Jeffrey O'Connell 45, Jian'an Luan 3, Amanda Elliott 6,7, Steven A McCarroll 6,7, Felicity Payne 11, Rosa Maria Roccascaccia 11, François Pattou 46, Praveen Sethupathy 47, Kristin Ardlie 48, Yavuz Ariyurek 49, Beverley Balkau 50, Philip Barter 51, John P Beilby 52,53, Yoav Ben-Shlomo 54, Rafn Benediktsson 55,56, Amanda J Bennett 4, Sven Bergmann 14,15, Murielle Bochud 15, Eric Boerwinkle 57, Amélie Bonnefond 13, Lori L Bonnycastle 47, Knut Borch-Johnsen 58,59, Yvonne Böttcher 60, Eric Brunner 36, Suzannah J Bumpstead 8, Guillaume Charpentier 61, Yii-Der Ida Chen 62, Peter Chines 47, Robert Clarke 63, Lachlan J M Coin 17, Matthew N Cooper 64, Marilyn Cornelis 37, Gabe Crawford 6, Laura Crisponi 65, Ian N M Day 38, Eco de Geus 23, Jerome Delplanque 13, Christian Dina 13, Michael R Erdos 47, Annette C Fedson 64,66, Antje Fischer-Rosinsky 67,68, Nita G Forouhi 3, Caroline S Fox 2,69, Rune Frants 70, Maria Grazia Franzosi 71, Pilar Galan 72, Mark O Goodarzi 62, Jürgen Graessler 73, Christopher J Groves 4, Scott Grundy 74, Rhian Gwilliam 8, Ulf Gyllensten 75, Samy Hadjadj 76, Göran Hallmans 77, Naomi Hammond 8, Xijing Han 10, Anna-Liisa Hartikainen 78, Neelam Hassanali 4, Caroline Hayward 25, Simon C Heath 79, Serge Hercberg 80, Christian Herder 81, Andrew A Hicks 82, David R Hillman 66,83, Aroon D Hingorani 36, Albert Hofman 22, Jennie Hui 52,84, Joe Hung 85,86, Bo Isomaa 87,88, Paul R V Johnson 4,89, Torben Jørgensen 90,91, Antti Jula 92, Marika Kaakinen 93, Jaakko Kaprio 94,95,96, Y Antero Kesaniemi 97, Mika Kivimäki 36, Beatrice Knight 98, Seppo Koskinen 99, Peter Kovacs 100, Kirsten Ohm Kyvik 101, G Mark Lathrop 79, Debbie A Lawlor 38, Olivier Le Bacquer 13, Cécile Lecoeur 13, Yun Li 10, Valeriya Lyssenko 102, Robert Mahley 103, Massimo Mangino 9, Alisa K Manning 1, María Teresa Martínez-Larrad 39, Jarred B McAteer 6,104,105, Laura J McCulloch 4, Ruth McPherson 106, Christa Meisinger 21, David Melzer 28, David Meyre 13, Braxton D Mitchell 45, Mario A Morken 47, Sutapa Mukherjee 66,83, Silvia Naitza 65, Narisu Narisu 47, Matthew J Neville 4,107, Ben A Oostra 108, Marco Orrù 65, Ruth Pakyz 45, Colin N A Palmer 109, Giuseppe Paolisso 110, Cristian Pattaro 82, Daniel Pearson 47, John F Peden 5,27, Nancy L. Pedersen 42, Markus Perola 96,111,112, Andreas F H Pfeiffer 67,68, Irene Pichler 82, Ozren Polasek 113, Danielle Posthuma 23,114, Simon C Potter 8, Anneli Pouta 115, Michael A Province 44, Bruce M Psaty 116,117, Wolfgang Rathmann 118, Nigel W Rayner 4,5, Kenneth Rice 119, Samuli Ripatti 96,111, Fernando Rivadeneira 22,120, Michael Roden 81,121, Olov Rolandsson 122, Anneli Sandbaek 123, Manjinder Sandhu 3,124, Serena Sanna 65, Avan Aihie Sayer 125, Paul Scheet 126, Laura J Scott 10, Udo Sedorf 127, Stephen J Sharp 3, Beverley Shields 98, Gunnar Sigursson 55,56, Erik J G Sijbrands 22,120, Angela Silveira 128, Laila Simpson 64,66, Andrew Singleton 129, Nicholas L Smith 130,131, Ulla Sovio 17, Amy Swift 47, Holly Syddall 125, Ann-Christine Syvänen 132, Toshiko Tanaka 133,134, Barbara Thorand 21, Jean Tichet 135, Anke Tönjes 60,136, Tiinamaija Tuomi 87,137, André G Uitterlinden 22,120, Ko Willems van Dijk 70,138, Mandy van Hoek 120, Dhiraj Varma 8, Sophie Visvikis-Siest 139, Veronique Vitart 25, Nicole Vogelzangs 140, Gérard Waeber 141, Peter J Wagner 96,111, Andrew Walley 142, G Bragi Walters 19, Kim L Ward 64,66, Hugh Watkins 5,27, Michael N



Weedon 28, Sarah H Wild 24, Gonneke Willemssen 23, Jaqueline C M Witteman 22, John W G Yarnell 143, Eleftheria Zeggini 5,8, Diana Zelenika 79, Björn Zethelius 43,144, Guangju Zhai 9, Jing Hua Zhao 3, M Carola Zillikens 120, Ingrid B Borecki 44, Ruth J F Loos 3, Pierre Meneton 80, Patrik K E Magnusson 42, David M Nathan 104,105, Gordon H Williams 69,105, Andrew T Hattersley 98, Kaisa Silander 96,111, Veikko Salomaa 146, George Davey Smith 38, Stefan R Bornstein 73, Peter Schwarz 73, Joachim Spranger 67,68, Fredrik Karpe 4,107, Alan R Shuldiner 45, Cyrus Cooper 125, George V Dedoussis 34, Manuel Serrano-Ríos 39, Andrew D Morris 109, Lars Lind 132, Lyle J Palmer 64,66,84, Frank B. Hu 147,148, Paul W Franks 149, Shah Ebrahim 150, Michael Marmot 36, W H Linda Kao 33,151,152, James S Pankow 153, Michael J Sampson 154, Johanna Kuusisto 155, Markku Laakso 155, Torben Hansen 31,156, Oluf Pedersen 31,59,157, Peter Paul Pramstaller 82,158,159, H Erich Wichmann 21,160,161, Thomas Illig 21, Igor Rudan 24,162,163, Alan F Wright 25, Michael Stumvoll 60, Harry Campbell 24, James F Wilson 24, Anders Hamsten 128 Richard N Bergman 164, Thomas A Buchanan 164,165, Francis S Collins 47, Karen L Mohlke 166, Jaakko Tuomilehto 94,167, Timo T Valle 167, David Altshuler 6,7,104,105, Jerome I Rotter 62, David S Siscovick 168, Brenda W J H Penninx 140, Dorret Boomsma 23, Panos Deloukas 8, Timothy D Spector 8,9, Timothy M Frayling 28, Luigi Ferrucci 169, Augustine Kong 19, Unnur Thorsteinsdottir 19,170, Kari Stefansson 19,170, Cornelia M van Duijn 22, Yurii S Aulchenko 22, Antonio Cao 65, Angelo Scuteri 65, 171, David Schlessinger 175, Manuela Uda 65, Aimo Ruukonen 172, Marjo-Riitta Jarvelin 17,93,173, Dawn M Waterworth 26, Peter Vollenweider 141, Leena Peltonen 8,48,96,111,112, Vincent Mooser 26, Goncalo R Abecasis 10, Nicholas J Wareham 3, Robert Sladek 40,41, Philippe Froguel 13,142, Richard M Watanabe 164,174, James B Meigs 35,105, Leif Groop 102, Michael Boehnke 10, Mark I McCarthy 4,5,107, Jose C Florez 6,7,104,105, Inês Barroso 11

- 1 Department of Biostatistics, Boston University School of Public Health, Boston, Massachusetts 02118, USA
- 2 National Heart, Lung, and Blood Institute's Framingham Heart Study, Framingham, Massachusetts 01702, USA
- 3 MRC Epidemiology Unit, Institute of Metabolic Science, Addenbrooke's Hospital, Cambridge CB2 0QQ, UK
- 4 Oxford Centre for Diabetes, Endocrinology and Metabolism, University of Oxford, Oxford OX3 7LJ, UK
- 5 Wellcome Trust Centre for Human Genetics, University of Oxford, Oxford OX3 7BN, UK
- 6 Program in Medical and Population Genetics, Broad Institute, Cambridge, Massachusetts 02142, USA
- 7 Center for Human Genetic Research, Massachusetts General Hospital, Boston, Massachusetts 02114, USA
- 8 Wellcome Trust Sanger Institute, Hinxton, Cambridge CB10 1SA, UK
- 9 Twin Research & Genetic Epidemiology Department, King's College London, St Thomas' Hospital Campus, Lambeth Palace Rd, London SE1 7EH, UK
- 10 Center for Statistical Genetics, Department of Biostatistics, University of Michigan School of Public Health, Ann Arbor, Michigan 48109, USA
- 11 Metabolic Disease Group, Wellcome Trust Sanger Institute, Hinxton, Cambridge CB10 1SA, UK
- 12 Cardiovascular Health Research Unit and Department of Medicine, University of Washington, Seattle, Washington, USA
- 13 CNRS-UMR8090, Pasteur Institute, Lille 2-Droit et Santé University, F-59000 Lille, France
- 14 Department of Medical Genetics, University of Lausanne, 1005 Lausanne, Switzerland
- 15 University Institute of Social and Preventative Medicine, Centre Hospitalier Universitaire Vaudois (CHUV) and University of Lausanne, 1005 Lausanne, Switzerland
- 16 Swiss Institute of Bioinformatics, Switzerland
- 17 Department of Epidemiology and Public Health, Imperial College of London, Faculty of Medicine, Norfolk Place, London W2 1PG, UK

- 18 Boston University Data Coordinating Center, Boston, Massachusetts 02118, USA  
19 deCODE Genetics, 101 Reykjavik, Iceland  
20 Department of Human Genetics, Leiden University Medical Centre, 2300 RC Leiden, The Netherlands  
21 Institute of Epidemiology, Helmholtz Zentrum Muenchen, German Research Center for Environmental Health, 85764 Neuherberg, Germany  
22 Department of Epidemiology, Erasmus MC Rotterdam, 3000 CA, The Netherlands  
23 Department of Biological Psychology, VU, Van der Boechorststraat 1, 1081 BT Amsterdam, The Netherlands  
24 Centre for Population Health Sciences, University of Edinburgh, Edinburgh EH8 9AG, UK  
25 MRC Human Genetics Unit, IGMM, Edinburgh EH4 2XU, UK  
26 Division of Genetics, R&D, Glaxo SmithKline, King of Prussia, Pennsylvania 19406, USA  
27 Department of Cardiovascular Medicine, University of Oxford, Oxford OX3 9DU, UK  
28 Genetics of Complex Traits, Institute of Biomedical and Clinical Sciences, Peninsula College of Medicine and Dentistry, University of Exeter EX1 2LU, UK  
29 Laboratory of Clinical Investigation, National Institute of Aging, Baltimore, Maryland 21250, USA  
30 Unit for Child and Adolescent Health and Welfare, National Institute for Health and Welfare, Biocenter Oulu, University of Oulu, 90014 Oulu, Finland  
31 Hagedorn Research Institute, 2820 Gentofte, Denmark  
32 Department of Medicine & Therapeutics, Level 7, Ninewells Hospital & Medical School, Dundee DD1 9SY, UK  
33 Department of Epidemiology, Bloomberg School of Public Health, Johns Hopkins University, Baltimore, Maryland 21287, USA  
34 Department of Nutrition – Dietetics, Harokopio University, 17671 Athens, Greece  
35 General Medicine Division, Massachusetts General Hospital, Boston, Massachusetts, USA  
36 Department of Epidemiology and Public Health, University College London, UK  
37 Depts. of Nutrition and Epidemiology, Harvard School of Public Health, Boston, Massachusetts, USA  
38 MRC Centre for Causal Analyses in Translational Epidemiology, University of Bristol, Bristol BS8 2PR, UK  
39 Fundación para la Investigación Biomédica del Hospital Clínico San Carlos, Madrid, Spain  
40 Departments of Medicine and Human Genetics, McGill University, Montreal, Canada  
41 Genome Quebec Innovation Centre, Montreal H3A 1A4, Canada  
42 Department of Medical Epidemiology and Biostatistics, Karolinska Institutet, Stockholm, Sweden  
43 Department of Public Health and Caring Sciences, Uppsala University, Uppsala, Sweden  
44 Division of Statistical Genomics, Department of Genetics, Washington University School of Medicine, St. Louis, Missouri, USA  
45 Division of Endocrinology, Diabetes and Nutrition, University of Maryland School of Medicine, Baltimore, Maryland 21201, USA  
46 INSERM U859, Université de Lille–Nord de France, F–59000 Lille, France  
47 Genome Technology Branch, National Human Genome Research Institute, Bethesda, Maryland 20892, USA  
48 The Broad Institute, Cambridge, Massachusetts 02141, USA  
49 Leiden Genome Technology Center, Leiden University Medical Center, 2300 RC Leiden, The Netherlands  
50 INSERM U780–IFR69, Paris Sud University, F–94807 Villejuif, France  
51 The Heart Research Institute, Sydney, New South Wales, Australia  
52 PathWest Laboratory of Western Australia, Department of Molecular Genetics, J Block, QEII Medical Centre, NEDLANDS WA 6009, Australia  
53 School of Surgery and Pathology, University of Western Australia, Nedlands WA 6009, Australia

- 54 Department of Social Medicine, University of Bristol, Bristol BS8 2PR, UK  
55 Landspítali University Hospital, 101 Reykjavik, Iceland  
56 Icelandic Heart Association, 201 Kopavogur, Iceland  
57 The Human Genetics Center and Institute of Molecular Medicine, University of Texas Health  
Science Center, Houston, Texas 77030, USA  
58 Steno Diabetes Center, DK-2820 Gentofte, Copenhagen, Denmark  
59 Faculty of Health Science, University of Aarhus, Aarhus DK-8000, Denmark  
60 Department of Medicine, University of Leipzig, Liebigstr. 18, 04103 Leipzig, Germany  
61 Endocrinology–Diabetology Unit, Corbeil–Essonnes Hospital, Essonnes, F-91108 France  
62 Medical Genetics Institute, Cedars–Sinai Medical Center, Los Angeles, California, USA  
63 Clinical Trial Service Unit and Epidemiological Studies Unit, University of Oxford, Oxford OX3  
7LF, UK  
64 Centre for Genetic Epidemiology and Biostatistics, University of Western Australia, Perth,  
Australia  
65 Istituto di Neurogenetica e Neurofarmacologia (INN), Consiglio Nazionale delle Ricerche, c/o  
Cittadella Universitaria di Monserrato, Monserrato, Cagliari 09042, Italy  
66 Western Australian Sleep Disorders Research Institute, Queen Elizabeth Medical Centre II, Perth,  
Australia  
67 Department of Endocrinology, Diabetes and Nutrition, Charité–Universitätsmedizin Berlin,  
Berlin, Germany  
68 Department of Clinical Nutrition, German Institute of Human Nutrition Potsdam–Rehbrücke,  
Nuthetal, Germany  
69 Division of Endocrinology, Diabetes, and Hypertension, Brigham and Women’s Hospital,  
Harvard Medical School, Boston, Massachusetts, USA  
70 Department of Human Genetics, Leiden University Medical Centre, 2300 RC Leiden, The  
Netherlands  
71 Department of Cardiovascular Research, Istituto di Ricerche Farmacologiche 'Mario Negri',  
Milan, Italy  
72 U557 Institut National de la Santé et de la Recherche Médicale, U1125 Institut National de la  
Recherche Agronomique, Université Paris 13, 74 rue Marcel Cachin, 93017 Bobigny Cedex,  
France  
73 Department of Medicine III, Division Prevention and Care of Diabetes, University of Dresden,  
01307 Dresden  
74 Center for Human Nutrition, University of Texas Southwestern Medical Center, Dallas, Texas,  
USA  
75 Department of Genetics and Pathology, Rudbeck Laboratory, Uppsala University, S-751 85  
Uppsala, Sweden  
76 CHU de Poitiers, Endocrinologie Diabetologie, CIC INSERM 0802, INSERM U927, Université  
de Poitiers, UFR, Médecine Pharmacie, Poitiers, France  
77 Department of Public Health & Clinical Medicine, Section for Nutritional Research, Umeå  
University, Umeå, Sweden  
78 Department of Clinical Sciences, Obstetrics and Gynecology, University of Oulu, Box 5000,  
Fin-90014 University of Oulu, Finland  
79 Centre National de Génotypage/IG/CEA, 2 rue Gaston Crémieux CP 5721, 91057 Evry Cedex,  
France  
80 U872 Institut National de la Santé et de la Recherche Médicale, Faculté de Médecine Paris  
Descartes, 15 rue de l’Ecole de Médecine, 75270 Paris Cedex, France  
81 Institute for Clinical Diabetology, German Diabetes Center, Leibniz Center for Diabetes Research  
at Heinrich Heine University Düsseldorf, 40225 Düsseldorf, Germany

- 82 Institute of Genetic Medicine, European Academy Bozen/Bolzano (EURAC), Viale Druso 1,  
39100 Bolzano, Italy, Affiliated Institute of the University Lübeck, Germany
- 83 Department of Pulmonary Physiology, Sir Charles Gairdner Hospital, Perth, Australia
- 84 Busselton Population Medical Research Foundation, Sir Charles Gairdner Hospital, Perth,  
Australia
- 85 Heart Institute of Western Australia, Sir Charles Gairdner Hospital, Nedlands WA 6009,  
Australia
- 86 School of Medicine and Pharmacology, University of Western Australia, Nedlands, WA 6009,  
Australia
- 87 Folkhalsan Research Centre, Helsinki, Finland
- 88 Malmiska Municipal Health Care Center and Hospital, Jakobstad, Finland
- 89 Nuffield Department of Surgery, University of Oxford, Oxford OX3 9DU, UK
- 90 Research Centre for Prevention and Health, Glostrup University Hospital, Glostrup, Denmark
- 91 Faculty of Health Science, University of Copenhagen, Copenhagen, Denmark
- 92 National Institute for Health and Welfare, Unit of Population Studies, Turku, Finland
- 93 Institute of Health Sciences and Biocenter Oulu, Box 5000, Fin-90014 University of Oulu,  
Finland
- 94 Department of Public Health, Faculty of Medicine, P.O. Box 41 (Mannerheimintie 172),  
University of Helsinki, 00014 Helsinki, Finland
- 95 National Institute for Health and Welfare, Unit for Child and Adolescent Mental Health, Helsinki,  
Finland
- 96 Institute for Molecular Medicine Finland FIMM, University of Helsinki, Helsinki, Finland
- 97 Department of Internal Medicine and Biocenter Oulu, Oulu, Finland
- 98 Diabetes Genetics, Institute of Biomedical and Clinical Science, Peninsula College of Medicine  
and Dentistry, University of Exeter, Exeter EX2 5DW, UK
- 99 National Institute for Health and Welfare, Unit of Living Conditions, Health and Wellbeing,  
Helsinki, Finland
- 100 Interdisciplinary Centre for Clinical Research, University of Leipzig, Inselstr. 22, 04103 Leipzig,  
Germany
- 101 The Danish Twin Registry, Epidemiology, Institute of Public Health, University of Southern  
Denmark, J.B. Winsløws Vej 9B, 5000 Odense, Denmark
- 102 Department of Clinical Sciences, Diabetes and Endocrinology, Lund University, University  
Hospital Malmö, Malmö, Sweden
- 103 Gladstone Institute of Cardiovascular Disease, University of California, San Francisco,  
California, USA
- 104 Diabetes Research Center (Diabetes Unit), Massachusetts General Hospital, Boston,  
Massachusetts 02114, USA
- 105 Department of Medicine, Harvard Medical School, Boston, Massachusetts 02115, USA
- 106 Division of Cardiology, University of Ottawa Heart Institute, Ottawa, Ontario, Canada
- 107 Oxford NIHR Biomedical Research Centre, Churchill Hospital, Oxford OX3 7LJ, UK
- 108 Department of Clinical Genetics, Erasmus MC Rotterdam, 3000 CA, The Netherlands
- 109 Biomedical Research Institute, University of Dundee, Ninewells Hospital & Medical School,  
Dundee DD1 9SY, UK
- 110 Department of Geriatric Medicine and Metabolic Disease, Second University of Naples, Naples,  
Italy.
- 111 National Institute for Health and Welfare, Unit of Public Health Genomics, Helsinki, Finland
- 112 Department of Medical Genetics, University of Helsinki, Helsinki, Finland
- 113 Department of Medical Statistics, Epidemiology and Medical Informatics, Andrija Stampar  
School of Public Health, Medical School, University of Zagreb, Rockefellerova 4, 10000 Zagreb,  
Croatia

- 114 Department of Clinical Genetics, VUMC, Van der Boechorststraat 7, 1081 BT Amsterdam, The Netherlands
- 115 Department of Obstetrics and Gynaecology, Oulu University Hospital, Oulu, Finland
- 116 Departments of Medicine, Epidemiology, and Health Services, University of Washington, Seattle, Washington, USA
- 117 Group Health Center for Health Studies, Seattle, Washington, USA
- 118 Institute of Biometrics and Epidemiology, German Diabetes Centre, Leibniz Centre at Heinrich Heine University Düsseldorf, Düsseldorf, Germany
- 119 Department of Biostatistics, University of Washington, Seattle, Washington 98195, USA
- 120 Department of Internal Medicine, Erasmus MC Rotterdam, 3000 CA, The Netherlands
- 121 Department of Medicine/Metabolic Diseases, Heinrich Heine University Düsseldorf, 40225 Düsseldorf, Germany
- 122 Department of Public Health & Clinical Medicine, Section for Family Medicine, Umeå University Hospital, Umeå, Sweden
- 123 School of Public Health, Department of General Practice, University of Aarhus, Aarhus DK-8000, Denmark
- 124 Department of Public Health and Primary Care, Strangeways Research Laboratory, University of Cambridge, Cambridge, UK
- 125 MRC Epidemiology Resource Centre, University of Southampton, Southampton General Hospital, Southampton SO16 6YD, UK
- 126 Department of Epidemiology, University of Texas, M.D. Anderson Cancer Center, Houston, Texas, 77030, USA
- 127 Leibniz-Institut für Arterioskleroseforschung an der Universität Münster, Münster, Germany
- 128 Atherosclerosis Research Unit, Department of Medicine, Karolinska Institutet, Stockholm, Sweden
- 129 Laboratory of Neurogenetics, National Institute on Aging, Bethesda, Maryland 20892, USA
- 130 Department of Epidemiology, University of Washington, Seattle, Washington 98195, USA
- 131 Seattle Epidemiologic Research and Information Center, Department of Veterans Affairs Office of Research and Development, Seattle, Washington, USA
- 132 Department of Medical Sciences, Uppsala University, Uppsala, Sweden
- 133 Medstar Research Institute, Baltimore, Maryland 21250, USA
- 134 Clinical Research Branch, National Institute on Aging, Baltimore, Maryland 21250, USA
- 135 Institut interrégional pour la santé (IRSA), F-37521 La Riche, France
- 136 Coordination Centre for Clinical Trials, University of Leipzig, Härtelstr. 16-18, 04103 Leipzig, Germany
- 137 Department of Medicine, Helsinki University Hospital, University of Helsinki, Helsinki, Finland
- 138 Department of Internal Medicine, Leiden University Medical Centre, 2300 RC Leiden, The Netherlands
- 139 Research Unit, Cardiovascular Genetics, Nancy University Henri Poincaré, Nancy, France
- 140 EMGO Institute/Department of Psychiatry, VU University Medical Center, Amsterdam, The Netherlands
- 141 Department of Internal Medicine, Centre Hospitalier Universitaire Vaudois, 1011 Lausanne, Switzerland
- 142 Genomic Medicine, Imperial College London, Hammersmith Hospital, W12 0NN, London, UK
- 143 Epidemiology & Public Health, Queen's University Belfast, Belfast BT12 6BJ, UK
- 144 Medical Products Agency, Uppsala, Sweden
- 145 Removed
- 146 National Institute for Health and Welfare, Unit of Chronic Disease Epidemiology and Prevention, Helsinki, Finland



- 147 Departments of Nutrition and Epidemiology, Harvard School of Public Health , Boston, Massachusetts, USA
- 148 Channing Laboratory, Brigham and Women's Hospital and Harvard Medical School, Boston, Massachusetts, USA
- 149 Genetic Epidemiology & Clinical Research Group, Department of Public Health & Clinical Medicine, Section for Medicine, Umeå University Hospital, Umeå, Sweden
- 150 London School of Hygiene and Tropical Medicine, London WC1E 7HT, UK
- 151 Department of Medicine, School of Medicine, Johns Hopkins University, Baltimore, Maryland 21287, USA
- 152 The Welch Center for Prevention, Epidemiology, and Clinical Research, School of Medicine and Bloomberg School of Public Health, Johns Hopkins University, Baltimore, Maryland 21287, USA
- 153 Division of Epidemiology and Community Health, School of Public Health, University of Minnesota, Minneapolis, Minnesota 55454, USA
- 154 Department of Endocrinology and Diabetes, Norfolk and Norwich University Hospital NHS Trust , Norwich, NR1 7UY, UK
- 155 Department of Medicine, University of Kuopio and Kuopio University Hospital, Kuopio 70210, Finland
- 156 Faculty of Health Science, University of Southern Denmark, Odense, Denmark
- 157 Institute of Biomedical Science, Faculty of Health Science, University of Copenhagen, Denmark
- 158 Department of Neurology, General Central Hospital, 39100 Bolzano, Italy
- 159 Department of Neurology, University of Lübeck, Ratzeburger Allee 160, 23538 Lübeck, Germany
- 160 Institute of Medical Informatics, Biometry and Epidemiology, Ludwig–Maximilians–Universität, Munich, Germany
- 161 Klinikum Grosshadern, Munich, Germany
- 162 School of Medicine, University of Split, Soltanska 2, 21000 Split, Croatia
- 163 Gen–Info Ltd, Ruzmarinka 17, 10000 Zagreb, Croatia
- 164 Department of Physiology and Biophysics, Keck School of Medicine, University of Southern California, Los Angeles, California 90033, USA
- 165 Department of Medicine, Division of Endocrinology, Keck School of Medicine, University of Southern California, Los Angeles, California 90033, USA
- 166 Department of Genetics, University of North Carolina, Chapel Hill, North Carolina 27599, USA
- 167 National Institute for Health and Welfare, Unit of Diabetes Prevention, Helsinki, Finland
- 168 Departments of Medicine and Epidemiology, University of Washington, Seattle, Washington, USA
- 169 Longitudinal Studies Section, Clinical Research Branch, National Institute on Aging, NIH, Baltimore, Maryland, USA
- 170 Faculty of Medicine, University of Iceland, 101 Reykjavík, Iceland
- 171 Lab of Cardiovascular Sciences, National Institute on Aging, NIH, Baltimore, Maryland, USA
- 172 Department of Clinical Sciences/Clinical Chemistry, University of Oulu, Box 5000, Fin–90014 University of Oulu, Finland
- 173 National Institute of Health and Welfare, Aapistie 1, P.O. Box 310, Fin–90101 Oulu, Finland
- 174 Department of Preventive Medicine, Keck School of Medicine, University of Southern California, Los Angeles, California, 90033, USA
- 175 National Institute on Aging, National Institute of Health, Baltimore Maryland 21224 USA

## DIAGRAM+ Investigators and Affiliations:

Benjamin F Voight<sup>1,2,3</sup>, Laura J Scott<sup>4</sup>, Valgerdur Steinthorsdottir<sup>5</sup>, Andrew P Morris<sup>6</sup>, Christian Dina<sup>7,8</sup>, Ryan P Welch<sup>9</sup>, Eleftheria Zeggini<sup>6,10</sup>, Cornelia Huth<sup>11,12</sup>, Yuri S Aulchenko<sup>13</sup>, Gudmar Thorleifsson<sup>5</sup>, Laura J McCulloch<sup>14</sup>, Teresa Ferreira<sup>6</sup>, Harald Grallert<sup>11,12</sup>, Najaf Amin<sup>13</sup>, Guanming Wu<sup>15</sup>, Cristen J Willer<sup>4</sup>, Soumya Raychaudhuri<sup>1,2,16</sup>, Steve A McCarroll<sup>1,17</sup>, Claudia Langenberg<sup>18</sup>, Oliver M Hofmann<sup>19</sup>, Josée Dupuis<sup>20,21</sup>, Lu Qi<sup>22-24</sup>, Ayellet V Segrè<sup>1,2,17</sup>, Mandy van Hoek<sup>25</sup>, Pau Navarro<sup>26</sup>, Kristin Ardlie<sup>1</sup>, Beverley Balkau<sup>27,28</sup>, Rafn Benediktsson<sup>29,30</sup>, Amanda J Bennett<sup>14</sup>, Roza Blagieva<sup>31</sup>, Eric Boerwinkle<sup>32</sup>, Lori L Bonnycastle<sup>33</sup>, Kristina Bengtsson Boström<sup>34</sup>, Bert Bravenboer<sup>35</sup>, Suzannah Bumpstead<sup>10</sup>, Noël P Burt<sup>1</sup>, Guillaume Charpentier<sup>36</sup>, Peter S Chines<sup>33</sup>, Marilyn Cornelis<sup>24</sup>, David J Couper<sup>37</sup>, Gabe Crawford<sup>1</sup>, Alex SF Doney<sup>38,39</sup>, Katherine S Elliott<sup>6</sup>, Amanda L Elliott<sup>1,17,40</sup>, Michael R Erdos<sup>33</sup>, Caroline S Fox<sup>21,41</sup>, Christopher S Franklin<sup>42</sup>, Martha Ganster<sup>4</sup>, Christian Gieger<sup>11</sup>, Niels Grarup<sup>43</sup>, Todd Green<sup>1,2</sup>, Simon Griffin<sup>18</sup>, Christopher J Groves<sup>14</sup>, Candace Guiducci<sup>1</sup>, Samy Hadjadj<sup>44</sup>, Neelam Hassanali<sup>14</sup>, Christian Herder<sup>45</sup>, Bo Isomaa<sup>46,47</sup>, Anne U Jackson<sup>4</sup>, Paul RV Johnson<sup>48</sup>, Torben Jørgensen<sup>49,50</sup>, Wen HL Kao<sup>51,52</sup>, Norman Klopp<sup>11</sup>, Augustine Kong<sup>5</sup>, Peter Kraft<sup>22,23</sup>, Johanna Kuusisto<sup>53</sup>, Torsten Lauritzen<sup>54</sup>, Man Li<sup>51</sup>, Aloysius Lieverse<sup>55</sup>, Cecilia M Lindgren<sup>6</sup>, Valeriya Lyssenko<sup>56</sup>, Michel Marre<sup>57,58</sup>, Thomas Meitinger<sup>59,60</sup>, Kristian Midthjell<sup>61</sup>, Mario A Morken<sup>33</sup>, Narisu Narisu<sup>33</sup>, Peter Nilsson<sup>56</sup>, Katharine R Owen<sup>14</sup>, Felicity Payne<sup>10</sup>, John RB Perry<sup>62,63</sup>, Ann-Kristin Petersen<sup>11</sup>, Carl Platou<sup>61</sup>, Christine Proença<sup>7</sup>, Inga Prokopenko<sup>6,14</sup>, Wolfgang Rathmann<sup>64</sup>, N William Rayner<sup>6,14</sup>, Neil R Robertson<sup>6,14</sup>, Ghislain Rocheleau<sup>65-67</sup>, Michael Roden<sup>45,68</sup>, Michael J Sampson<sup>69</sup>, Richa Saxena<sup>1,2,40</sup>, Beverley M Shields<sup>62,63</sup>, Peter Shrader<sup>3,70</sup>, Gunnar Sigurdsson<sup>29,30</sup>, Thomas Sparsø<sup>43</sup>, Klaus Strassburger<sup>64</sup>, Heather M Stringham<sup>4</sup>, Qi Sun<sup>22,23</sup>, Amy J Swift<sup>33</sup>, Barbara Thorand<sup>11</sup>, Jean Tichet<sup>71</sup>, Tiinamaija Tuomi<sup>46,72</sup>, Rob M van Dam<sup>24</sup>, Timon W van Haften<sup>73</sup>, Thijs van Herpt<sup>25,55</sup>, Jana V van Vliet-Ostaptchouk<sup>74</sup>, G Bragi Walters<sup>5</sup>, Michael N Weedon<sup>62,63</sup>, Cisca Wijmenga<sup>75</sup>, Jacqueline Witteman<sup>13</sup>, Richard N Bergman<sup>76</sup>, Stephane Cauchi<sup>7</sup>, Francis S Collins<sup>77</sup>, Anna L Gloyn<sup>14</sup>, Ulf Gyllenstein<sup>78</sup>, Torben Hansen<sup>43,79</sup>, Winston A Hide<sup>19</sup>, Graham A Hitman<sup>80</sup>, Albert Hofman<sup>13</sup>, David J Hunter<sup>22,23</sup>, Kristian Hveem<sup>61,81</sup>, Markku Laakso<sup>53</sup>, Karen L Mohlke<sup>82</sup>, Andrew D Morris<sup>38,39</sup>, Colin NA Palmer<sup>38,39</sup>, Peter P Pramstaller<sup>83</sup>, Igor Rudan<sup>42,84,85</sup>, Eric Sijbrands<sup>25</sup>, Lincoln D Stein<sup>15</sup>, Jaakko Tuomilehto<sup>86</sup>, Andre Uitterlinden<sup>25</sup>, Mark Walker<sup>87</sup>, Nicholas J Wareham<sup>18</sup>, Richard M Watanabe<sup>76,88</sup>, Goncalo R Abecasis<sup>4</sup>, Bernhard O Boehm<sup>31</sup>, Harry Campbell<sup>42</sup>, Mark J Daly<sup>1,2</sup>, Andrew T Hattersley<sup>62,63</sup>, Frank B Hu<sup>22-24</sup>, James B Meigs<sup>3,70</sup>, James S Pankow<sup>89</sup>, Oluf Pedersen<sup>43,90,91</sup>, H-Erich Wichmann<sup>11,12,92</sup>, Inês Barroso<sup>10</sup>, Jose C Florez<sup>1,2,3,93</sup>, Timothy M Frayling<sup>62,63</sup>, Leif Groop<sup>56,72</sup>, Rob Sladek<sup>65-67</sup>, Unnur Thorsteinsdottir<sup>5,94</sup>, James F Wilson<sup>42</sup>, Thomas Illig<sup>11</sup>, Philippe Froguel<sup>7,95</sup>, Cornelia M van Duijn<sup>13</sup>, Kari Stefansson<sup>5,94</sup>, David Altshuler<sup>1,2,3,17,40,93</sup>, Michael Boehnke<sup>4</sup>, Mark I McCarthy<sup>6,14,96</sup>.

1. Broad Institute of Harvard and Massachusetts Institute of Technology (MIT), Cambridge, Massachusetts 02142, USA
2. Center for Human Genetic Research, Massachusetts General Hospital, 185 Cambridge Street, Boston, Massachusetts 02114, USA
3. Department of Medicine, Harvard Medical School, Boston, Massachusetts 02115, USA
4. Department of Biostatistics, University of Michigan, Ann Arbor, Michigan 48109-2029, USA
5. deCODE Genetics, 101 Reykjavik, Iceland
6. Wellcome Trust Centre for Human Genetics, University of Oxford, Oxford, OX3 7BN, UK
7. CNRS-UMR-8090, Institute of Biology and Lille 2 University, Pasteur Institute, F-59019 Lille, France
8. INSERM UMR915 CNRS ERL3147 F-44007 Nantes, France
9. Bioinformatics Program, University of Michigan, Ann Arbor MI USA 48109
10. Wellcome Trust Sanger Institute, Hinxton, CB10 1HH, UK
11. Institute of Epidemiology, Helmholtz Zentrum Muenchen, 85764 Neuherberg, Germany
12. Institute of Medical Informatics, Biometry and Epidemiology, Ludwig-Maximilians-Universität, 81377 Munich, Germany



13. Department of Epidemiology, Erasmus University Medical Center, P.O. Box 2040, 3000 CA Rotterdam, The Netherlands.
14. Oxford Centre for Diabetes, Endocrinology and Metabolism, University of Oxford, OX3 7LJ, UK
15. Ontario Institute for Cancer Research, 101 College Street, Suite 800, Toronto, Ontario M5G 0A3, Canada
16. Division of Rheumatology, Immunology and Allergy, Brigham and Women's Hospital, Harvard Medical School, Boston, Massachusetts 02115, USA
17. Department of Molecular Biology, Harvard Medical School, Boston, Massachusetts 02115, USA
18. MRC Epidemiology Unit, Institute of Metabolic Science, Addenbrooke's Hospital, Cambridge CB2 0QQ, UK
19. Department of Biostatistics, Harvard School of Public Health, Boston, Massachusetts 02115, USA
20. Department of Biostatistics, Boston University School of Public Health, Boston, Massachusetts 02118, USA
21. National Heart, Lung, and Blood Institute's Framingham Heart Study, Framingham, Massachusetts 01702, USA
22. Department of Nutrition, Harvard School of Public Health, 665 Huntington Ave, Boston, MA 02115, USA
23. Department of Epidemiology, Harvard School of Public Health, 665 Huntington Ave, Boston, MA 02115, USA
24. Channing Laboratory, Dept. of Medicine, Brigham and Women's Hospital and Harvard Medical School, 181 Longwood Ave, Boston, MA 02115, USA
25. Department of Internal Medicine, Erasmus University Medical Centre, PO-Box 2040, 3000 CA Rotterdam, The Netherlands
26. MRC Human Genetics Unit, Institute of Genetics and Molecular Medicine, Western General Hospital, Edinburgh, EH4 2XU, UK
27. INSERM U780, F-94807 Villejuif, France
28. University Paris-Sud, F-91405 Orsay, France
29. Landspítali University Hospital, 101 Reykjavik, Iceland
30. Icelandic Heart Association, 201 Kopavogur, Iceland
31. Division of Endocrinology, Diabetes and Metabolism, Ulm University, 89081 Ulm, Germany
32. The Human Genetics Center and Institute of Molecular Medicine, University of Texas Health Science Center, Houston, Texas 77030, USA
33. National Human Genome Research Institute, National Institute of Health, Bethesda, Maryland 20892, USA
34. R&D Centre, Skaraborg Primary Care, 541 30 Skövde, Sweden
35. Department of Internal Medicine, Catharina Hospital, PO-Box 1350, 5602 ZA Eindhoven, The Netherlands
36. Endocrinology-Diabetology Unit, Corbeil-Essonnes Hospital, F-91100 Corbeil-Essonnes, France
37. Department of Biostatistics and Collaborative Studies Coordinating Center, University of North Carolina at Chapel Hill, Chapel Hill, North Carolina, 27599, USA
38. Diabetes Research Centre, Biomedical Research Institute, University of Dundee, Ninewells Hospital, Dundee DD1 9SY, UK
39. Pharmacogenomics Centre, Biomedical Research Institute, University of Dundee, Ninewells Hospital, Dundee DD1 9SY, UK
40. Department of Genetics, Harvard Medical School, Boston, Massachusetts 02115, USA
41. Division of Endocrinology, Diabetes, and Hypertension, Brigham and Women's Hospital, Harvard Medical School, Boston, Massachusetts 02115, USA
42. Centre for Population Health Sciences, University of Edinburgh, Teviot Place, Edinburgh, EH8 9AG, UK
43. Hagedorn Research Institute, DK-2820 Gentofte, Denmark

44. Centre Hospitalier Universitaire de Poitiers, Endocrinologie Diabetologie, CIC INSERM 0801, INSERM U927, Université de Poitiers, UFR, Médecine Pharmacie, 86021 Poitiers Cedex, France
45. Institute for Clinical Diabetology, German Diabetes Center, Leibniz Center for Diabetes Research at Heinrich Heine University Düsseldorf, 40225 Düsseldorf, Germany
46. Folkhälsan Research Center, FIN-00014 Helsinki, Finland
47. Malmiska Municipal Health Center and Hospital, 68601 Jakobstad, Finland
48. Diabetes Research and Wellness Foundation Human Islet Isolation Facility and Oxford Islet Transplant Programme, University of Oxford, Old Road, Headington, Oxford, OX3 7LJ, UK
49. Research Centre for Prevention and Health, Glostrup University Hospital, DK-2600 Glostrup, Denmark
50. Faculty of Health Science, University of Copenhagen, 2200 Copenhagen, Denmark
51. Department of Epidemiology, Johns Hopkins University, Baltimore, Maryland 21287, USA
52. Department of Medicine, and Welch Center for Prevention, Epidemiology, and Clinical Research, Johns Hopkins University, Baltimore, Maryland 21287, USA
53. Department of Medicine, University of Kuopio and Kuopio University Hospital, FIN-70211 Kuopio, Finland
54. Department of General Medical Practice, University of Aarhus, DK-8000 Aarhus, Denmark
55. Department of Internal Medicine, Maxima MC, PO-Box 90052, 5600 PD Eindhoven, The Netherlands
56. Department of Clinical Sciences, Diabetes and Endocrinology Research Unit, University Hospital Malmö, Lund University, 205 02 Malmö, Sweden
57. Department of Endocrinology, Diabetology and Nutrition, Bichat-Claude Bernard University Hospital, Assistance Publique des Hôpitaux de Paris, 75870 Paris Cedex 18, France
58. INSERM U695, Université Paris 7, 75018 Paris, France
59. Institute of Human Genetics, Helmholtz Zentrum Muenchen, 85764 Neuherberg, Germany
60. Institute of Human Genetics, Klinikum rechts der Isar, Technische Universität München, 81675 Muenchen, Germany
61. Nord-Trøndelag Health Study (HUNT) Research Center, Department of Community Medicine and General Practice, Norwegian University of Science and Technology, NO-7491 Trondheim, Norway
62. Genetics of Complex Traits, Institute of Biomedical and Clinical Science, Peninsula Medical School, University of Exeter, Magdalen Road, Exeter EX1 2LU, UK
63. Diabetes Genetics, Institute of Biomedical and Clinical Science, Peninsula Medical School, University of Exeter, Barrack Road, Exeter EX2 5DW, UK
64. Institute of Biometrics and Epidemiology, German Diabetes Center, Leibniz Center for Diabetes Research at Heinrich Heine University Düsseldorf, 40225 Düsseldorf, Germany
65. Department of Human Genetics, McGill University, Montreal H3H 1P3, Canada
66. Department of Medicine, Faculty of Medicine, McGill University, Montreal, H3A 1A4, Canada
67. McGill University and Genome Quebec Innovation Centre, Montreal, H3A 1A4, Canada
68. Department of Metabolic Diseases, Heinrich Heine University Düsseldorf, 40225 Düsseldorf, Germany
69. Department of Endocrinology and Diabetes, Norfolk and Norwich University Hospital NHS Trust, Norwich, NR1 7UY, UK.
70. General Medicine Division, Massachusetts General Hospital, Boston, Massachusetts, USA
71. Institut interrégional pour la Santé (IRSA), F-37521 La Riche, France
72. Department of Medicine, Helsinki University Hospital, University of Helsinki, FIN-00290 Helsinki, Finland
73. Department of Internal Medicine, University Medical Center Utrecht, 3584 CG Utrecht, The Netherlands
74. Molecular Genetics, Medical Biology Section, Department of Pathology and Medical Biology, University Medical Center Groningen and University of Groningen, 9700 RB Groningen, The Netherlands

75. Department of Genetics, University Medical Center Groningen and University of Groningen, 9713 EX Groningen, The Netherlands
76. Department of Physiology and Biophysics, University of Southern California School of Medicine, Los Angeles, California 90033, USA
77. National Institute of Health, Bethesda, Maryland 20892, USA
78. Department of Genetics and Pathology, Rudbeck Laboratory, Uppsala University, S-751 85 Uppsala, Sweden.
79. University of Southern Denmark, DK-5230 Odense, Denmark
80. Centre for Diabetes, Barts and The London School of Medicine and Dentistry, Queen Mary University of London, London E1 2AT, UK
81. Department of Medicine, The Hospital of Levanger, N-7600 Levanger, Norway
82. Department of Genetics, University of North Carolina, Chapel Hill, North Carolina 27599, USA
83. Institute of Genetic Medicine, European Academy Bozen/Bolzano (EURAC), Viale Druso 1, 39100 Bolzano, Italy
84. Croatian Centre for Global Health, Faculty of Medicine, University of Split, Soltanska 2, 21000 Split, Croatia
85. Institute for Clinical Medical Research, University Hospital "Sestre Milosrdnice", Vinogradska 29, 10000 Zagreb, Croatia
86. Department of Chronic Disease Prevention, National Institute for Health and Welfare, Helsinki FIN-00300, Finland,
87. Diabetes Research Group, Institute of Cellular Medicine, Newcastle University, Framlington Place, Newcastle upon Tyne NE2 4HH, UK
88. Department of Preventive Medicine, Keck Medical School, University of Southern California, Los Angeles, CA, 90089-9001, USA
89. Division of Epidemiology and Community Health, University of Minnesota, Minneapolis, Minnesota 55454, USA
90. Department of Biomedical Science, Panum, Faculty of Health Science, University of Copenhagen, 2200 Copenhagen, Denmark
91. Faculty of Health Science, University of Aarhus, DK-8000 Aarhus, Denmark
92. Klinikum Grosshadern, 81377 Munich, Germany
93. Diabetes Unit, Massachusetts General Hospital, Boston, Massachusetts 02144, USA
94. Faculty of Medicine, University of Iceland, 101 Reykjavík, Iceland
95. Genomic Medicine, Imperial College London, Hammersmith Hospital, W12 0NN, London, UK  
Oxford National Institute for Health Research Biomedical Research Centre, Churchill Hospital, Old Road Headington, Oxford, OX3 7LJ, UK
